# Supplementary material for: Discovering the diversity of tadpoles in the mid-north Brazil: morphological and molecular identification, and characterization of the habitat
Source: PeerJ. 2023 Dec 14;11:e16640. doi: 10.7717/peerj.16640 (PMC10725668; doi:10.7717/peerj.16640)
Supplement: Supplemental Information 1 — Annual Temp. = annual temperature average (o C); Anual Rain. = annual rainfall average (mm); Season of sampling = rainy season from December to April, dry season from May to November. Most of the sampling points presented in Appendix S1 were sampled only once, except points 6, 9 and 10 that were sampled twice each. [file peerj-11-16640-s001.docx]

## Discovering the diversity of tadpoles in the mid-north Brazil: morphological and molecular identification, and characterization of the habitat

Patrícia dos Santos Sousa1, Carlos Augusto Silva de Azevêdo1, Maria Claudene Barros1,Elmary da Costa Fraga1, Thaís B. Guedes2,3

1Centro de Estudos Superiores de Caxias, Universidade Estadual do Maranhão, 65604-380, Caxias, MA, Brazil

2Departamento de Biologia Animal, Instituto de Biologia, Universidade Estadual de Campinas, 13083-862, Campinas, SP, Brazil

3Gothenburg Global Biodiversity Center, University of Gothenburg, Department of Biological and Environmental Sciences, Box 461, SE-405-30, Göteborg, Sweden

Corresponding author: Thaís B. Guedes. Address: Rua Monteiro Lobato, 255, Cidade Universitária, 13083-862, Campinas, SP, Brazil. E-mail: thaisbguedes@yahoo.com.br

Supporting information

**Appendix S1.** Spatial and climatic data (extracted from WorldClim: Fick & Hijmans, 2017) of the study area in the eastern Maranhão, mid-north region of Brazil. Annual Temp. = annual temperature average (o C); Anual Rain. = annual rainfall average (mm); Season of sampling = rainy season from December to April, dry season from May to November. Most of the sampling points presented in Appendix S1 were sampled only once, except points 6, 9 and 10 that were sampled twice each.

| **Sampled localities** | **Point** | **Geographic coordinates** | **Annual Temp. (min/max)** | **Annual Rain.** | **Season of sampling** |
| --- | --- | --- | --- | --- | --- |
|  |  |  |  |  | Rainy |
| Village of Timbaúba, municipality of São Mateus do Maranhão, Maranhão, Brazil | 1 | 4°06'33.1"S  44°28'20.0"W | 22.1/32.7 | 132.5 |  |
|  |  |  |  |  | Rainy |
| Village of São José, municipality of São Mateus do Maranhão, Maranhão, Brazil | 2 | 3°58'45.8"S  44°26'39.6"W | 22.1/32.6 | 138.9 |  |
|  |  |  |  |  | Rainy |
| Village of Nego, municipality of Coroatá, Maranhão, Brazil | 3 | 4°2'46.11"S  44°4'16.54"W | 21.9/32.4 | 133.5 |  |
|  |  |  |  |  | Dry |
| Village of Cheio d'água, municipality of Aldeias Altas, Maranhão, Brazil | 4 | 4°38'37.1"S 43°30'45.1"W | 21.5/32.7 | 128.3 |  |
|  |  |  |  |  | Dry |
| Surroundings of Buriti Corrente, municipality of Caxias, Maranhão, Brazil | 5 | 4°45'00.8"S 43°40'26.7"W | 21.5/32.7 | 126 |  |
|  |  |  |  |  | Rainy |
| Surroundings of Inhamum Protected Area, municipality of Caxias, Maranhão, Brazil | 6 | 4°53'23.0"S 43°24'30.9"W | 21.3/32.4 | 127.6 |  |
|  |  |  |  |  | Dry |
| Surroundings of Buriti do Meio Protected Area, municipality of Caxias, Maranhão, Brazil | 7 | 4°54'15.3"S 43°06'56.4"W | 21.5/32.8 | 130.4 |  |
| Village of Sobra, municipality of Caxias, Maranhão, Brazil | 8 | 5°02'44.2"S  43°34'14.7"W |  | 128.6 | Dry |
|  | 21.2/32.1 |  |  |
| Village of Bacabal, municipality of São João do Sóter, Maranhão, Brazil | 9 | 5°07'53.5"S  43°48'13.8"W | 21.1/32.3 | 116.5 | Rainy |

| Village of São José dos Perdidos, municipality de São João do Sóter,  Maranhão, Brazil | 10 | 5°10'39.4"S 43°51'59.2"W | 21.1/32.2 | 114.3 | Rainy |
| --- | --- | --- | --- | --- | --- |
