# Supplementary material for: Discovering the diversity of tadpoles in the mid-north Brazil: morphological and molecular identification, and characterization of the habitat
Source: PeerJ. 2023 Dec 14;11:e16640. doi: 10.7717/peerj.16640 (PMC10725668; doi:10.7717/peerj.16640)
Supplement: Supplemental Information 3 [file peerj-11-16640-s003.docx]

## Discovering the diversity of tadpoles in the mid-north Brazil: morphological and molecular identification, and characterization of the habitat

Patrícia dos Santos Sousa1, Carlos Augusto Silva de Azevêdo1, Maria Claudene Barros1,Elmary da Costa Fraga1, Thaís B. Guedes2,3

1Centro de Estudos Superiores de Caxias, Universidade Estadual do Maranhão, 65604-380, Caxias, MA, Brazil

2Departamento de Biologia Animal, Instituto de Biologia, Universidade Estadual de Campinas, 13083-862, Campinas, SP, Brazil

3Gothenburg Global Biodiversity Center, University of Gothenburg, Department of Biological and Environmental Sciences, Box 461, SE-405-30, Göteborg, Sweden

Corresponding author: Thaís B. Guedes. Address: Rua Monteiro Lobato, 255, Cidade Universitária, 13083-862, Campinas, SP, Brazil. E-mail: thaisbguedes@yahoo.com.br

Supporting information

**Appendix S3.** Voucher numbers for the specimens of the present study (organized by lots considering collection data, locality and species) housed at the Museum of Biological Diversity – Zoology area (MDBio – ZUEC), of the Institute of Biology, State University of Campinas, Brazil.

| **ZUEC** | **Species** | **Date** | **ZUEC** | **Species** | **Date** |
| --- | --- | --- | --- | --- | --- |
| 26120 | *Boana* cf. *atlantica* | 12.x.2019 | 26195 | *Leptodactylus natalensis* | 27.xii.2019 |
| 26121 | *Boana* cf. *atlantica* | 24.x.2019 | 26197 | *Leptodactylus fuscus* | 03.i.2020 |
| 26122 | *Rhinella diptycha* | 25.xii.2019 | 26198 | *Leptodactylus fuscus* | 29.i.2020 |
| 26123 | *Dermatonotus muelleri* | 12.i.2020 | 26199 | *Leptodactylus fuscus* | 30.i.2020 |
| 26124 | *Dermatonotus muelleri* | 09.i.2020 | 26200 | *Leptodactylus fuscus* | 02.ii.2020 |
| 26125 | *Dermatonotus muelleri* | 06.i.2020 | 26201 | *Scinax* cf. *similis* | 07.iv.2019 |
| 26126 | *Dermatonotus muelleri* | 07.i.2020 | 26202 | *Scinax* cf. *similis* | 19.iii.2019 |
| 26127 | *Rhinella diptycha* | 12.i.2020 | 26203 | *Physalaemus nattereri* | 27.xi.2019 |
| 26128 | *Rhinella diptycha* | 09.i.2020 | 26204 | *Physalaemus nattereri* | 02.ii.2020 |
| 26129 | *Leptodactylus vastus* | 01.i.2020 | 26205 | *Osteocephalus taurinus* | 25.xii.2019 |
| 26130 | *Scinax x-signatus* | 20.ix.2019 | 26206 | *Osteocephalus taurinus* | 24.x.2019 |
| 26131 | *Scinax x-signatus* | 28.i.2020 | 26207 | *Boana multifasciata* | 28.viii.2019 |
| 26132 | *Scinax x-signatus* | 07.vi.2019 | 26208 | *Boana multifasciata* | 12.x.2019 |
| 26133 | *Rhinella diptycha* | 13.x.2019 | 26209 | *Boana multifasciata* | 25.ii.2019 |
| 26134 | *Physalaemus cuvieri* | 30.i.2020 | 26210 | *Boana multifasciata* | 24.x.2019 |
| 26135 | *Elachistocleis cesarii* | 30.i.2020 | 26211 | *Scinax x-signatus* | 04.x.2019 |
| 26136 | *Leptodactylus vastus* | 30.i.2019 | 26212 | *Scinax x-signatus* | 30.i.2020 |
| 26137 | *Leptodactylus pustulatus* | 20.ix.2019 | 26213 | *Scinax x-signatus* | 02.ii.2020 |
| 26138 | *Pseudopaludicola* sp. | 20.ix.2019 | 26214 | *Scinax x-signatus* | 21.xii.2019 |
| 26139 | *Scinax fuscomarginatus* | 28.i.2020 | 26215 | *Trachycephalus typhonius* | 09.i.2020 |
| 26140 | *Physalaemus cuvieri* | 02.ii.2020 | 26216 | *Trachycephalus typhonius* | 12.i.2020 |
| 26141 | *Physalaemus cuvieri* | 19.iii.2019 | 26217 | *Trachycephalus typhonius* | 04.i.2020 |
| 26142 | *Physalaemus cuvieri* | 07.iv.2019 | 26218 | *Dendropsophus soaresi* | 30.i.2020 |
| 26143 | *Physalaemus cuvieri* | 07.vi.2019 | 26219 | *Dendropsophus soaresi* | 19.iii.2019 |
| 26144 | *Rhinella diptycha* | 16.xi.2019 | 26220 | *Dendropsophus soaresi* | 12.xii.2019 |
| 26145 | *Leptodactylus vastus* | 19.iii.2019 | 26221 | *Dendropsophus soaresi* | 12.i.2020 |
| 26146 | *Leptodactylus vastus* | 03.i.2020 | 26222 | *Dendropsophus soaresi* | 01.i.2020 |
| 26147 | *Physalaemus cuvieri* | 07.vi.2019 | 26223 | *Dendropsophus soaresi* | 02.ii.2020 |
| 26148 | *Boana raniceps* | 07.vi.2019 | 26224 | *Dendropsophus soaresi* | 09.i.2020 |
| 26149 | *Dendropsophus nanus* | 07.vi.2019 | 26225 | *Dendropsophus soaresi* | 15.i.2020 |
| 26150 | *Boana* cf. *atlantica* | 20.ix.2019 | 26226 | *Leptodactylus mystaceus* | 01.xii.2019 |
| 26189 | *Pithecopus* aff. *hypochondrialis* | 19.iii.2019 | 26227 | *Leptodactylus macrosternum* | 04.i.2020 |
| 26190 | *Pithecopus* aff. *hypochondrialis* | 02.ii.2020 | 26228 | *Leptodactylus macrosternum* | 06.i.2020 |
| 26191 | *Pithecopus* aff. *hypochondrialis* | 07.vi.2019 | 26229 | *Leptodactylus macrosternum* | 09.i.2020 |
| 26192 | *Leptodactylus natalensis* | 10.vi.2019 | 26230 | *Rhinella mirandaribeiroi* | 21.xii.2019 |
| 26193 | *Pithecopus* aff. *hypochondrialis* | 07.iv.2019 | 26231 | *Rhinella mirandaribeiroi* | 07.i.2020 |
| 26194 | *Pithecopus* aff. *hypochondrialis* | 19.iii.2019 | 26232 | *Rhinella mirandaribeiroi* | 09.i.2020 |
