# Supplementary material for: Discovering the diversity of tadpoles in the mid-north Brazil: morphological and molecular identification, and characterization of the habitat
Source: PeerJ. 2023 Dec 14;11:e16640. doi: 10.7717/peerj.16640 (PMC10725668; doi:10.7717/peerj.16640)
Supplement: Supplemental Information 5 [file peerj-11-16640-s005.docx]

## Discovering the diversity of tadpoles in the mid-north Brazil: morphological and molecular identification, and characterization of the habitat

Patrícia dos Santos Sousa1, Carlos Augusto Silva de Azevêdo1, Maria Claudene Barros1,Elmary da Costa Fraga1, Thaís B. Guedes2,3

1Centro de Estudos Superiores de Caxias, Universidade Estadual do Maranhão, 65604-380, Caxias, MA, Brazil

2Departamento de Biologia Animal, Instituto de Biologia, Universidade Estadual de Campinas, 13083-862, Campinas, SP, Brazil

3Gothenburg Global Biodiversity Center, University of Gothenburg, Department of Biological and Environmental Sciences, Box 461, SE-405-30, Göteborg, Sweden

Corresponding author: Thaís B. Guedes. Address: Rua Monteiro Lobato, 255, Cidade Universitária, 13083-862, Campinas, SP, Brazil. E-mail: thaisbguedes@yahoo.com.br

Supporting information

**Appendix S5.** GenBank accession numbers for the gene rRNA 16S used as reference library in the present study.

| Species | GenBank numbers | | |
| --- | --- | --- | --- |
| **Bufonidae** |  | | |
| *Rhinella diptycha* (*R*. *jimi*) | MH004313 | | |
| *Rhinella mirandaribeiroi* | KP685226 | | |
| **Hylidae** |  | | |
| *Boana multifasciata* | OP037631 | | |
| *Boana* cf. *atlantica* | MK348503 | | |
| *Dendropsophus soaresi* | MT503922 | | |
| *Osteocephalus taurinus* | JX564881 | | |
| *Pithecopus aff. hypochondrialis* | KC520707 | | |
|  |  | | |
| *Scinax x-signatus* | | OP022082 |
| *Scinax fuscomarginatus* | | KJ004150 |
| *Scinax nebulosus* | | KJ004190 |
| *Scinax cf. similis* | | OP022101 |
| *Trachycephalus typhonius* | | KF723121 |
| **Leptodactylidae (Leiuperinae)** | |  |
| *Physalaemus cuvieri* | | HQ592351 |
| *Physalaemus nattereri* | | JQ627214 |
| **Leptodactylidae (Leptodactylinae)** | |  |
| *Leptodactylus fuscus* | | AY911281 |
| *Leptodactylus macrosternum* | | MT495861 |
| *Leptodactylus mystaceus* | | MN958079 |
| *Leptodactylus natalensis* | | MH004304 |
| *Leptodactylus pustulatus* | | MW291413 |
| *Leptodactylus troglodytes* | | KM091620 |
| **Microhylidae (Gastrophryninae)** | |  |
| *Dermatonotus muelleri* | | MH004297 |
| *Elachistocleis cesarii* | | KM509129 |
