# Supplementary material for: Discovering the diversity of tadpoles in the mid-north Brazil: morphological and molecular identification, and characterization of the habitat
Source: PeerJ. 2023 Dec 14;11:e16640. doi: 10.7717/peerj.16640 (PMC10725668; doi:10.7717/peerj.16640)
Supplement: Supplemental Information 6 — BL = body length from snout to the point where the axis of the tail myotomes meets the body wall; TAL = tail; TL = total length; ED = eye diameter; IOD = interorbital distance; IND = internarial distance (center to center); ODW = oral disk width; BH = body height; BW = maximum body width; MTH = maximum tail height; TMH = tail muscle height at body-tail junction, where ventral line of musculature meets trunk contour. [file peerj-11-16640-s006.xlsx]

## Sheet: Planilha1
Sousa et al. Discovering the diversity of tadpoles in the mid-north region of Brazil: morphological and molecular identification, and ecological aspects of the microhabitats. Appendix S6. Morphometric data of the tadpoles of the eastern Maranhão, mid-north region of Brazil. BL = body length from snout to the point where the axis of the tail myotomes meets the body wall; TAL = tail; TL = total len…
	Gosner development stage	BL	TAL	TL	ED	IOD	IND	ODW	BH	BW	MTH	TMH
Bufonidae
Rhinella diptycha	34	7.5	9	16.5	0.8	1.1	0.8	1.8	3.2	4.5	2.9	1.1
	35	8	9.9	17.9	0.9	1.5	0.9	2	3.5	4.7	2.9	1.2
	36	8.2	10.5	18.7	1	1.7	0.9	2	3.4	4.7	3	1.3
	37	8.3	10.6	18.9	1	1.7	0.9	2.1	3.5	4.8	3.2	1.3
	38	8.4	11.1	19.5	1.1	1.8	0.9	2.4	3.6	5.2	3.6	1.4
Rinella mirandaribeiroi	34	5.9	7.6	13.6	0.7	0.8	0.6	1.2	2.7	3.4	2.4	1
	35	6.1	7.8	13.6	0.7	0.9	0.6	1.3	2.7	3.5	2.4	1
	36	6	8.4	14.4	0.7	0.8	0.6	1.2	2.7	2.8	2.4	1
	37	6.5	8.8	15.4	0.8	0.9	0.6	1.3	2.9	3.6	2.5	1.2
	39	6.7	9	15.7	0.8	0.8	0.6	1.2	3	3.7	2.7	1.2
	40	6.8	9.3	15.8	0.9	0.9	0.6	1.5	3	3.8	2.8	1.3
Hylidae
Boana cf. atlantica	34	10.6	22.5	33.1	1.5	3.2	2.1	2.1	4.6	5.9	4.7	2.9
	35	12.5	22.7	35.3	1.6	3.4	2.2	2.4	5.3	6.9	5.9	3.6
	36	14.1	23.8	37.9	1.6	34	2.3	2.6	6.1	7.2	6.4	4.3
	37	14.3	25.8	40.1	1.7	3.5	2.3	2.8	6.8	7.5	6.7	4.4
Boana raniceps	36	17.2	36.4	53.7	2.2	3.9	2.4	3.1	1.6	9.2	7.9	4.4
	39	17.2	41.9	59.1	2.7	5.8	2.5	3.3	8.2	9.5	8.1	4.5
Boana multifasciata	35	11.8	23.6	35.4	1.8	2.6	2	2.5	5.5	6.5	5.4	3.4
	36	12	24.3	36.4	1.8	2.7	2.2	2.4	5.3	6.8	5.4	3.5
	37	12.4	24.5	36.9	1.9	3	2.3	2.5	5.8	7.1	5.5	3.6
	38	12	27.8	40.2	1.9	2.9	2.3	2.5	5.8	7.1	5.5	3.6
	39	12.3	28.1	40.3	1.9	3.1	2.3	2.7	5.9	7.2	5.8	3.6
Dendropsophus cf. nanus	37	6.1	12.7	18.9	1	1.9	0.98	0.8	3.4	3.1	2.6	2
Dendropsophus soaresi	35	9.2	18.2	27.5	1.4	3.5	2	1.6	5.4	5.4	6.6	3.2
	36	9.3	18.4	27.8	1.7	3.5	2.1	1.6	5.4	5.4	6.9	3
	37	9.7	19.5	29.2	1.8	3.6	2.1	1.7	5.1	5.6	7.1	2.8
Osteocephalus taurinus	34	9.5	17.1	26.7	1.3	3	2.4	2.6	4.3	5.3	4	2
	35	9.4	16.5	26	1.1	2.5	2.4	2.6	4.4	5.5	4	1.9
	36	9.7	17.7	27.5	1.4	2.9	2.4	2.6	4.3	5.5	3.9	2.3
	37	10	1.5	27.6	1.3	3.3	2.4	2.8	5.1	5.5	3.7	1.9
	39	10.9	18.6	29.5	1.4	3.5	2.7	2.6	4.9	6.2	3.8	2.4
	40	9.8	19.2	29.1	1.4	3.4	2.8	2.8	4.9	5.9	3.9	2
Pithecopus aff. hypochondrialis	36	13.3	25.5	38.8	2.5	5.9	2.5	2.3	6.7	6.4	3.9	3.1
	37	13.7	25.8	39.5	2.5	5.7	2.6	2.3	6.6	6.8	3.7	2.7
	38	13.8	27.6	41.4	2.4	6	2.99	2.4	7.3	6.9	4.2	3.1
Scinax fuscomarginatus	34	6.6	13.9	20.6	1	1.7	1.6	1.7	3.3	3.1	3.5	1.7
	36	7.3	13.9	21.3	1.1	2.1	1.8	1.8	4	3.9	4.3	1.8
Scinax x-signatus	34	7.8	15.6	23.5	1.3	3.9	2.6	1.9	4.7	4.9	5.8	2.3
	35	9.5	9.5	28.9	1.4	4.7	3.1	2.5	6.4	5.1	7.1	3
	39	11.5	24.9	36.4	2	5.1	3.7	2.8	7	5.9	7.6	3.6
	40	11.6	24.3	35.9	1.9	5.6	3.6	3	6.9	6.3	8.7	3.4
Scinax cf. similis	34	8.7	13.6	22.4	1.3	2.5	2.4	2	5	4.7	4.9	2.5
	35	7.4	12.47	19.9	1.6	2.7	2	1.9	4.9	4.4	6	1.9
	36	7.9	15.2	23	1.4	2.7	2.1	1.7	5	4.8	5.5	2.3
	37	8.1	13.6	21.7	1.5	2.7	2.3	1.8	5	4.7	5.1	2.5
	38	8.5	15.1	23.6	1.6	2.8	2.4	1.9	5.4	4.7	5.9	2.5
	39	8.6	12.8	21.4	1.6	2.6	2.1	2	4.6	4.5	5.4	2.6
Trachycephalus typhonius	34	11.7	21	32.7	1.6	5.3	3.6	2.5	6.4	6.8	7.1	3
	35	12.4	22.9	35.3	1.7	5.6	3.6	2.8	6.6	7.2	7.7	3.1
	36	13.5	25.6	36.2	1.7	6.1	3.9	2.6	6.8	8.1	8.7	3.4
	37	13.2	26.1	39.3	1.7	5.6	3.8	2.7	7.4	8	8.1	3.4
	38	13.7	25.7	39.5	2	6.3	4	3	7.6	7.9	8.2	3.6
	40	14.2	24	38.3	2.1	5.1	3.9	3.1	7.3	7.9	9.4	3.9
Leptodactylidae
Leptodactylus fuscus	35	10.2	17.5	27.7	1.3	2.3	1.4	2	4.7	6	4.3	2.1
	36	10.7	18.1	28.8	1.4	2.5	1.4	2	4.9	5.9	4.9	2.2
	37	11.8	19.5	31.3	1.5	2.4	1.4	2.1	5.3	6.4	4.8	2.5
Leptodactylus macrosternum	34	14.7	20.5	35.2	0.9	1.9	1.8	2.9	6.1	6.9	8.1	3
	35	15.7	22.8	38.5	1	1.9	1.7	3	6.4	6.8	8.4	3.2
	36	16.6	25.1	41.7	1.1	2.1	1.9	3.2	6.9	7.7	9.3	3.4
Leptodactylus mystaceus	35	9.7	18.1	27.9	1.4	2.2	1.4	2.3	4.1	4.1	4.5	2.1
	36	10.7	19.8	30.6	1.4	2.4	1.4	2.5	4.5	5.8	4.6	2.3
	37	11.3	21.5	32.8	1.4	2.5	1.4	2.6	4.6	5.9	4.7	2.3
	38	11.1	21.3	32.4	1.5	2.5	1.4	2.5	4.7	6.1	4.6	2.3
Leptodactylus natalensis	34	6.9	9.3	16.2	0.7	1.1	1	1.4	3.1	3.3	2.4	1.1
	35	6.9	10	17	0.7	1.1	1	1.5	3	3.5	2.4	1.1
Leptodactylus pustulatus	38	13.6	20.1	33.7	1.2	2.5	1.5	2	5.2	6.2	6.6	2.8
	39	14.8	22.6	37.5	1.3	2.8	1.5	2.3	6.1	7.6	7.6	3.3
	40	14.3	22.8	37.2	1.4	2.8	1.4	2.2	5.8	7.1	6.9	3.1
Leptodactylus vastus	35	15.3	36.9	52.3	1.9	3.5	2.4	2.6	7.3	8.8	7.1	4.6
	36	16.3	40.5	56.8	2	4	2.5	2.7	7.4	9.2	7.6	5
	38	15.7	41.1	56.8	1.8	3.64	2.3	2.5	8.2	9.2	7.3	4.6
Physalaemus cuvieri	34	6.6	10.2	16.9	0.9	0.9	0.5	1.2	2.8	4.2	2.6	1.2
	35	6.8	10.7	17.5	1	0.8	0.5	1.2	2.9	4.3	2.3	1.3
	36	7.6	11.8	19.4	1	1	0.7	1.3	3.6	47	2.6	1.4
	37	7.5	11	18.6	1	1	0.7	1.3	3.4	4.5	2.9	1.6
	38	7.6	12.5	20.2	1.1	1.1	0.7	1.5	3.2	4.8	2.9	1.5
	39	8	13.8	21.8	1.1	1.1	0.7	1.4	3.4	5	3.4	1.6
Physalaemus nattereri	34	8.9	14.4	23.4	1	1.5	0.8	1.9	4.1	5.2	3.9	1.7
	35	9.6	15.3	25	1.1	1.6	0.9	2	4.4	6	4.1	2.1
	36	10.6	17.8	28.4	1.3	1.8	1	2.3	4.8	6.5	4.3	2.4
	37	11.3	17.7	29	1.3	1.7	0.9	2.3	5.9	6.6	4.7	2.5
	38	10.9	17.1	28	1.4	1.8	1	2.2	5.2	6.5	4.5	2.5
Pseudopaludicola sp.	36	7	11.9	19	1	1	1.6	1.1	2.6	3.5	2.6	1.5
Microhylidae
Dermatonotus muelleri	34	12.3	17.3	29.6	1.5	7.9		2.6	6.9	8.4	7.9	3.3
	35	12.2	19.3	31.6	1.3	7.5		2.5	6.6	8.7	8.5	3.1
	36	12.8	16.4	29.2	1.7	8		2.7	6.6	8.1	7.9	3.9
	37	13.3	17	30.3	1.7	8.4		2.8	7.1	8.6	8.1	3.9
Elachistocleis cesarii	34	7.9	15.7	23.6	1.1	5		2.8	4.1	5.8	4.6	2.2
	35	8.4	17.1	25.6	1.2	5.6		2.9	4.6	6.3	4.9	2.3
	36	8.8	17.2	26	1.1	5.9		2.9	4.5	6.3	5.2	1.9
