# Supplementary material for: Discovering the diversity of tadpoles in the mid-north Brazil: morphological and molecular identification, and characterization of the habitat
Source: PeerJ. 2023 Dec 14;11:e16640. doi: 10.7717/peerj.16640 (PMC10725668; doi:10.7717/peerj.16640)
Supplement: Supplemental Information 7 — The numbers on the diagonal, in bold, correspond to the intrapopulation mean. [file peerj-11-16640-s007.docx]

## Discovering the diversity of tadpoles in the mid-north Brazil: morphological and molecular identification, and characterization of the habitat

Patrícia dos Santos Sousa1, Carlos Augusto Silva de Azevêdo1, Maria Claudene Barros1,Elmary da Costa Fraga1, Thaís B. Guedes2,3

1Centro de Estudos Superiores de Caxias, Universidade Estadual do Maranhão, 65604-380, Caxias, MA, Brazil

2Departamento de Biologia Animal, Instituto de Biologia, Universidade Estadual de Campinas, 13083-862, Campinas, SP, Brazil

3Gothenburg Global Biodiversity Center, University of Gothenburg, Department of Biological and Environmental Sciences, Box 461, SE-405-30, Göteborg, Sweden

Corresponding author: Thaís B. Guedes. Address: Rua Monteiro Lobato, 255, Cidade Universitária, 13083-862, Campinas, SP, Brazil. E-mail: thaisbguedes@yahoo.com.br

**Supporting information**

**Appendix S7.** Percentage of nucleotide divergences generated for the gene rRNA 16S for the tadpole species in the present study. The numbers on the diagonal, in bold, correspond to the intrapopulation mean.

| **SPECIES** | **GENETIC DISTANCE (%)** | | | | | | | | | | | | | | | | | | | | | | |
| --- | --- | --- | --- | --- | --- | --- | --- | --- | --- | --- | --- | --- | --- | --- | --- | --- | --- | --- | --- | --- | --- | --- | --- |
|  | **1** | **2** | **3** | **4** | **5** | **6** | **7** | **8** | **9** | **10** | **11** | **12** | **13** | **14** | **15** | **16** | **17** | **18** | **19** | **20** | **21** | **22** | **23** |
| 1. *B*. *multifasciata* | **0.23** |  |  |  |  |  |  |  |  |  |  |  |  |  |  |  |  |  |  |  |  |  |  |
| 2. *B*. cf. *punctata* | 17.70 | **0** |  |  |  |  |  |  |  |  |  |  |  |  |  |  |  |  |  |  |  |  |  |
| 3. *O*. *taurinus* | 20.04 | 19.61 | **0.38** |  |  |  |  |  |  |  |  |  |  |  |  |  |  |  |  |  |  |  |  |
| 4. *D*. *soaresi* | 22.51 | 20.36 | 13.94 | **0.15** |  |  |  |  |  |  |  |  |  |  |  |  |  |  |  |  |  |  |  |
| 5. *T*. *typhonius* | 17.15 | 18.37 | 8.34 | 11.88 | **0.39** |  |  |  |  |  |  |  |  |  |  |  |  |  |  |  |  |  |  |
| 6. *S*. *fuscomarginatus* | 25.19 | 24.89 | 21.33 | 25.32 | 22.04 | **0.10** |  |  |  |  |  |  |  |  |  |  |  |  |  |  |  |  |  |
| 7. *S*. cf. *nebulosus* | 24.87 | 23.56 | 18.35 | 21.80 | 18.92 | 20.90 | **0.26** |  |  |  |  |  |  |  |  |  |  |  |  |  |  |  |  |
| 8. *S*. cf. *similis* | 22.61 | 21.53 | 18.81 | 24.54 | 20.73 | 17.27 | 18.55 | **0.13** |  |  |  |  |  |  |  |  |  |  |  |  |  |  |  |
| 9. *S*. *x-signatus* | 24.84 | 20.91 | 21.52 | 22.75 | 22.41 | 17.17 | 17.94 | 12.36 | **0.43** |  |  |  |  |  |  |  |  |  |  |  |  |  |  |
| 10. *P*. *nattereri* | 20.32 | 24.05 | 17.28 | 20.55 | 16.43 | 25.39 | 24.62 | 24.68 | 24.77 | **0.50** |  |  |  |  |  |  |  |  |  |  |  |  |  |
| 11. *P*. *cuvieri* | 23.61 | 21.76 | 17.20 | 22.82 | 17.08 | 25.33 | 25.79 | 24.34 | 24.78 | 11.49 | **0.50** |  |  |  |  |  |  |  |  |  |  |  |  |
| 12. *L*. *fuscus* | 19.04 | 19.12 | 16.16 | 17.10 | 15.22 | 25.62 | 19.83 | 20.86 | 21.02 | 19.53 | 18.09 | **0.95** |  |  |  |  |  |  |  |  |  |  |  |
| 13. *L*. *pustulatus* | 21.88 | 25.73 | 17.28 | 22.21 | 18.00 | 26.49 | 23.36 | 21.95 | 20.36 | 20.27 | 21.13 | 12.01 | **0.80** |  |  |  |  |  |  |  |  |  |  |
| 14. *L*. *macrosternum* | 20.72 | 22.68 | 18.48 | 22.06 | 15.62 | 27.49 | 22.34 | 22.58 | 22.41 | 18.63 | 18.30 | 12.24 | 9.61 | **0.58** |  |  |  |  |  |  |  |  |  |
| 15. *L*. *troglodytes* | 21.36 | 21.18 | 17.92 | 23.16 | 17.70 | 26.08 | 22.02 | 21.89 | 20.10 | 21.76 | 18.34 | 8.47 | 12.67 | 12.64 | **0.20** |  |  |  |  |  |  |  |  |
| 16. *L*. *natalensis* | 23.19 | 25.04 | 19.99 | 23.17 | 18.04 | 26.46 | 21.93 | 20.20 | 18.86 | 20.98 | 20.47 | 13.05 | 12.25 | 12.77 | 13.51 | **1.09** |  |  |  |  |  |  |  |
| 17. *L*. *mystaceus* | 21.11 | 23.63 | 19.19 | 23.62 | 17.45 | 25.71 | 20.46 | 24.09 | 23.32 | 20.26 | 21.82 | 9.21 | 15.02 | 13.14 | 13.26 | 15.52 | **0.82** |  |  |  |  |  |  |
| 18. *R*. *mirandaribeiroi* | 21.67 | 17.93 | 18.55 | 21.16 | 16.55 | 22.45 | 22.99 | 21.30 | 22.82 | 18.70 | 17.67 | 17.68 | 20.33 | 18.87 | 21.10 | 21.45 | 22.42 | **0.55** |  |  |  |  |  |
| 19. *R*. *diptycha* | 23.63 | 20.57 | 19.99 | 22.76 | 19.20 | 23.42 | 23.03 | 23.89 | 23.69 | 21.17 | 20.89 | 17.58 | 18.58 | 18.30 | 19.83 | 22.47 | 21.31 | 8.87 | **0.19** |  |  |  |  |
| 20. *D*. *muelleri* | 24.50 | 27.61 | 19.74 | 23.03 | 19.29 | 25.89 | 25.53 | 21.84 | 23.78 | 18.88 | 19.40 | 20.19 | 21.84 | 19.65 | 19.06 | 22.82 | 21.95 | 21.86 | 21.18 | **0.20** |  |  |  |
| 22. *E*. *cesarii* | 22.03 | 23.70 | 19.02 | 23.95 | 19.09 | 25.98 | 24.72 | 22.21 | 23.62 | 17.79 | 18.45 | 20.84 | 22.93 | 21.00 | 21.41 | 20.07 | 24.72 | 18.26 | 17.77 | 11.63 | **2.31** |  |  |
| 23. *P*. aff. *hypochodrialis* | 22.03 | 21.98 | 16.79 | 19.19 | 17.10 | 24.82 | 24.75 | 25.06 | 26.03 | 23.27 | 23.52 | 20.51 | 22.41 | 22.27 | 22.91 | 25.69 | 24.37 | 22.29 | 21.74 | 24.02 | 21.60 | **0.49** |  |
| Outgroup | 31.08 | 33.20 | 26.24 | 30.77 | 27.82 | 34.09 | 35.30 | 35.29 | 33.76 | 31.23 | 31.93 | 26.70 | 29.69 | 29.46 | 29.02 | 30.95 | 30.54 | 30.87 | 29.64 | 34.10 | 34.85 | 32.58 | **30.0** |
