# Supplementary material for: Discovering the diversity of tadpoles in the mid-north Brazil: morphological and molecular identification, and characterization of the habitat
Source: PeerJ. 2023 Dec 14;11:e16640. doi: 10.7717/peerj.16640 (PMC10725668; doi:10.7717/peerj.16640)
Supplement: Supplemental Information 8 — Molecular identification was performed by comparing the sequences generated in this study and those provided in the BLAST platform. [file peerj-11-16640-s008.docx]

## Discovering the diversity of tadpoles in the mid-north Brazil: morphological and molecular identification, and characterization of the habitat

Patrícia dos Santos Sousa1, Carlos Augusto Silva de Azevêdo1, Maria Claudene Barros1,Elmary da Costa Fraga1, Thaís B. Guedes2,3

1Centro de Estudos Superiores de Caxias, Universidade Estadual do Maranhão, 65604-380, Caxias, MA, Brazil

2Departamento de Biologia Animal, Instituto de Biologia, Universidade Estadual de Campinas, 13083-862, Campinas, SP, Brazil

3Gothenburg Global Biodiversity Center, University of Gothenburg, Department of Biological and Environmental Sciences, Box 461, SE-405-30, Göteborg, Sweden

Corresponding author: Thaís B. Guedes. Address: Rua Monteiro Lobato, 255, Cidade Universitária, 13083-862, Campinas, SP, Brazil. E-mail: thaisbguedes@yahoo.com.br

Supporting information

**Appendix S8.** Comparison between the results from morphological characterization and molecular identification. Molecular identification was performed by comparing the sequences generated in this study and those provided in the BLAST platform. GFN: Guedes Field Number

| **GFN - Tadpoles** | **Morphological characterization** | **Molecular identification** | **Similarity from BLAST** |
| --- | --- | --- | --- |
| 71 | *Rhinella diptycha* | *R*. *diptycha* | 99.47% |
| 72 | *Rhinella diptycha* | *R*. *diptycha* | 99.47% |
| 73 | *Rhinella diptycha* | *R*. *diptycha* | 99.47% |
| 77 | *Rhinella diptycha* | *R*. *diptycha* | 99.29% |

| 78 | *Rhinella diptycha* | *R*. *diptycha* | 95.74% |
| --- | --- | --- | --- |
| 149 | *Rhinella* cf. *mirandaribeiroi* | *R*. *mirandaribeiroi* | 98.51% |
| 147 | *Rhinella* cf. *mirandaribeiroi* | *R*. *mirandaribeiroi* | 98.72% |
| 146 | *Rhinella* cf. *mirandaribeiroi* | *R*. *mirandaribeiroi* | 98.72% |
| 185 | *Rhinella* cf. *mirandaribeiroi* | *R*. *mirandaribeiroi* | 98.75% |
| 186 | *Rhinella* cf. *mirandaribeiroi* | *R*. *mirandaribeiroi* | 98.93% |
| 36 | *Boana* sp. | *B*. *multifasciata* | 99.82% |
| 07 | *Boana* sp. | *B*. *multifasciata* | 99.63% |
| 164 | *Boana* sp. | *B*. *multifasciata* | 99.45% |
| 165 | *Boana* sp. | *B*. *multifasciata* | 99.63% |
| 81 | *Boana* sp. | *B*. *multifasciata* | 99.82% |
| 82 | *Boana* sp. | *B*. *multifasciata* | 99.08% |
| 88 | *Boana punctata* | *B.* cf. *atlantica* | 100% |
| 89 | *Boana punctata* | *B.* cf. *atlantica* | 100% |
| 93 | *Boana punctata* | *B.* cf. *atlantica* | 100% |
| 94 | *Boana punctata* | *B.* cf. *atlantica* | 98.94% |
| 95 | *Boana punctata* | *B.* cf. *atlantica* | 98.86% |
| 177 | *Dendropsophus* cf. *melanargyreus* | *D*. *soaresi* | 99.64% |
| 13 | *Dendropsophus* cf. *melanargyreus* | *D. soaresi* | 99.81% |
| 25 | *Dendropsophus* sp. | *D. soaresi* | 100% |

| 169 | *Dendropsophus* cf. *melanargyreus* | *D*. *soaresi* | 99.46% |
| --- | --- | --- | --- |
| 170 | *Dendropsophus* cf. *melanargyreus* | *D*. *soaresi* | 99.45% |
| 171 | *Dendropsophus* cf. *melanargyreus* | *D*. *soaresi* | 99.45% |
| 172 | *Dendropsophus* cf. *melanargyreus* | *D*. *soaresi* | 99.28% |
| 173 | *Dendropsophus* cf. *melanargyreus* | *D*. *soaresi* | 99.45% |
| 175 | *Dendropsophus* cf. *melanargyreus* | *D*. *soaresi* | 99.82% |
| 176 | *Dendropsophus* cf. *melanargyreus* | *D*. *soaresi* | 98.39% |
| 18 | *Osteocephalus taurinus* | *O*. *taurinos* | 99.13% |
| 19 | *Osteocephalus taurinus* | *O*. *taurinos* | 99.13% |
| 34 | *Osteocephalus taurinus* | *O*. *taurinos* | 99.48% |
| 35 | *Osteocephalus taurinus* | *O*. *taurinos* | 99.96% |
| 37 | *Osteocephalus taurinus* | *O*. *taurinos* | 99.48% |
| 38 | *Osteocephalus taurinus* | *O*. *taurinos* | 99.14% |
| 39 | *Osteocephalus taurinus* | *O*. *taurinos* | 99.97% |
| 160 | *Scinax* sp. 1 | *S*. *x-signatus* | 99.44% |
| 24 | *Scinax* sp. 1 | *S*. *x-signatus* | 100.00% |
| 161 | *Scinax* sp. 1 | *S*. *x-signatus* | 99.24% |
| 190 | *Scinax* sp. 1 | *S*. *x-signatus* | 98.50% |
| 202 | *Scinax* sp. 1 | *S*. *x-signatus* | 99.44% |
| 180 | *Scinax* sp. 1 | *S*. *nebulosus* | 98.74% |

| 201 | *Scinax* sp. 1 | *S*. *nebulosus* | 99.64% |
| --- | --- | --- | --- |
| 189 | *Scinax* cf. *fuscomarginatus* | *S. fuscomarginatus* | 99.81% |
| 200 | *Scinax* cf. *fuscomarginatus* | *S. fuscomarginatus* | 99.45% |
| 199 | *Scinax* cf. *fuscomarginatus* | *S. fuscomarginatus* | 97.86% |
| 40 | *Scinax* sp. 2 | *S*. cf. *similis* | 99.82% |
| 44 | *Scinax* sp. 2 | *S*. cf. *similis* | 99.82% |
| 45 | *Scinax* sp. 2 | *S*. cf. *similis* | 99.64% |
| 46 | *Scinax* sp. 2 | *S*. cf. *similis* | 99.82% |
| 11 | *Scinax* sp. 2 | *S*. cf. *similis* | 99.82% |
| 12 | *Scinax* sp. 2 | *S*. cf. *similis* | 99.82% |
| 14 | *Scinax* sp. 2 | *S*. cf. *similis* | 99.82% |
| 124 | *Trachycephalus typhonius* | *T*. *typhonius* | 98.23% |
| 125 | *Trachycephalus typhonius* | *T*. *typhonius* | 99.08% |
| 126 | *Trachycephalus typhonius* | *T*. *typhonius* | 98.23% |
| 127 | *Trachycephalus typhonius* | *T*. *typhonius* | 99.45% |
| 128 | *Trachycephalus typhonius* | *T*. *typhonius* | 99.29% |
| 54 | *Physalaemus cuvieri* | *P*. *cuvieri* | 99.07% |
| 55 | *Physalaemus cuvieri* | *P*. *cuvieri* | 99.09% |
| 58 | *Physalaemus cuvieri* | *P*. *cuvieri* | 99.08% |
| 60 | *Physalaemus cuvieri* | *P*. *cuvieri* | 98.88% |

| 20 | *Physalaemus cuvieri* | *P*. *cuvieri* | 98.72% |
| --- | --- | --- | --- |
| 21 | *Physalaemus cuvieri* | *P*. *cuvieri* | 99.08% |
| 22 | *Physalaemus cuvieri* | *P*. *cuvieri* | 98.34% |
| 23 | *Physalaemus cuvieri* | *P*. *cuvieri* | 99.08% |
| 143 | *Physalaemus cuvieri* | *P*. *cuvieri* | 99.07% |
| 142 | *Physalaemus cuvieri* | *P*. *cuvieri* | 98.15% |
| 140 | *Physalaemus cuvieri* | *P*. *cuvieri* | 98.35% |
| 84 | *Physalaemus* cf. *nattereri* | *P*. *nattereri* | 97.92% |
| 106 | *Physalaemus* cf. *nattereri* | *P*. *nattereri* | 98.12% |
| 153 | *Physalaemus* cf. *nattereri* | *P*. *nattereri* | 98.96% |
| 182 | *Physalaemus* cf. *nattereri* | *P*. *nattereri* | 98.53% |
| 183 | *Physalaemus* cf. *nattereri* | *P*. *nattereri* | 98.53% |
| 184 | *Physalaemus* cf. *nattereri* | *P*. *nattereri* | 98.50% |
| 105 | *Leptodactylus fuscus* | *L*. *fuscus* | 98.44% |
| 107 | *Leptodactylus fuscus* | *L*. *fuscus* | 98.45% |
| 108 | *Leptodactylus fuscus* | *L*. *fuscus* | 98.79% |
| 110 | *Leptodactylus fuscus* | *L*. *fuscus* | 98.26% |
| 129 | *Leptodactylus macrosternum* | *L*. *macrosternum* | 98.73% |
| 130 | *Leptodactylus macrosternum* | *L*. *macrosternum* | 98.91% |
| 131 | *Leptodactylus macrosternum* | *L*. *macrosternum* | 99.27% |

| 132 | *Leptodactylus macrosternum* | *L*. *macrosternum* | 99.45% |
| --- | --- | --- | --- |
| 133 | *Leptodactylus macrosternum* | *L*. *macrosternum* | 99.08% |
| 114 | *Leptodactylus mystaceus* | *L*. *mystaceus* | 97.65% |
| 115 | *Leptodactylus mystaceus* | *L*. *mystaceus* | 98.21% |
| 116 | *Leptodactylus mystaceus* | *L*. *mystaceus* | 97.14% |
| 117 | *Leptodactylus mystaceus* | *L*. *mystaceus* | 96.99% |
| 187 | *Leptodactylus mystaceus* | *L*. *mystaceus* | 97.68% |
| 188 | *Leptodactylus mystaceus* | *L*. *mystaceus* | 98.03% |
| 15 | *Leptodactylus natalensis* | *L*. *natalensis* | 99.63% |
| 16 | *Leptodactylus natalensis* | *L*. *natalensis* | 99.63% |
| 17 | *Leptodactylus natalensis* | *L*. *natalensis* | 99.64% |
| 47 | *Leptodactylus natalensis* | *L*. *natalensis* | 99.45% |
| 48 | *Leptodactylus natalensis* | *L*. *natalensis* | 99.45% |
| 49 | *Leptodactylus natalensis* | *L*. *natalensis* | 97.62% |
| 50 | *Leptodactylus natalensis* | *L*. *natalensis* | 99.63% |
| 51 | *Leptodactylus natalensis* | *L*. *natalensis* | 99.64% |
| 52 | *Leptodactylus natalensis* | *L*. *natalensis* | 98.54% |
| 191 | *Leptodactylus natalensis* | *L*. *natalensis* | 100% |
| 195 | *Leptodactylus natalensis* | *L*. *natalensis* | 99.80% |
| 194 | *Leptodactylus natalensis* | *L*. *natalensis* | 99.63% |

| 193 | *Leptodactylus natalensis* | *L*. *natalensis* | 99.45% |
| --- | --- | --- | --- |
| 192 | *Leptodactylus natalensis* | *L*. *natalensis* | 99.45% |
| 63 | *Leptodactylus* cf. *pustulatus* | *L*. *pustulatus* | 98.17% |
| 64 | *Leptodactylus* cf. *pustulatus* | *L*. *pustulatus* | 99.09% |
| 65 | *Leptodactylus* cf. *pustulatus* | *L*. *pustulatus* | 97.45% |
| 67 | *Leptodactylus* cf. *pustulatus* | *L*. *pustulatus* | 98.88% |
| 66 | *Leptodactylus* cf. *pustulatus* | *L*. *pustulatus* | 98.69% |
| 01 | *Leptodactylus troglodytes* | *L*. *troglodytes* | 98.75% |
| 02 | *Leptodactylus troglodytes* | *L*. *troglodytes* | 99.10% |
| 03 | *Leptodactylus troglodytes* | *L*. *troglodytes* | 98.74% |
| 04 | *Leptodactylus troglodytes* | *L*. *troglodytes* | 99.28% |
| 05 | *Leptodactylus troglodytes* | *L*. *troglodytes* | 99.28% |
| 06 | *Leptodactylus troglodytes* | *L*. *troglodytes* | 99.45% |
| 83 | *Dermatonotus muelleri* | *D*. *muelleri* | 98.05% |
| 163 | *Elachistocleis* sp. | *E*. *cesarii* | 98.10% |
| 08 | *Pithecopus hypochondrialis* | *P*. *hypochondrialis* | 99.10% |
| 09 | *Pithecopus hypochondrialis* | *P*. aff. *hypochondrialis* | 98.58% |
| 10 | *Pithecopus hypochondrialis* | *P*. aff. *hypochondrialis* | 99.29% |
| 29 | *Pithecopus hypochondrialis* | *P*. aff. *hypochondrialis* | 98.94% |
| 30 | *Pithecopus hypochondrialis* | *P*. aff*. hypochondrialis* | 98.76% |

| 31 | *Pithecopus hypochondrialis* | *P*. aff*. hypochondrialis* | 98.60% |
| --- | --- | --- | --- |
| 32 | *Pithecopus hypochondrialis* | *P*. aff. *hypochondrialis* | 98.94% |
| 33 | *Pithecopus hypochondrialis* | *P*. aff. *hypochondrialis* | 98.77% |
